# Supplementary material for: Effect of Disparity in Self Dispersion Interactions on Phase Behaviors of Molten A-b-B Diblock Copolymers
Source: MDPI journal article supplement (doi:10.3390/polym15010030), 2022-12-21
Supplement: s1 [file s1]

## Supplementary Material

# Effect of Disparity in Self Dispersion Interactions on Phase Behaviors of Molten A-b-B Diblock Copolymers

Xinyue Zhang, Mingge Zhao and Junhan Cho \*

Department of Polymer Science & Engineering, Dankook University, 152 Jukjeon-ro, Suji-gu, Yongin, Gyeonggi-do 16890, Republic of Korea

\* Correspondence: jhcho@dankook.ac.kr; Tel.: +82-31-8005-3586

### I. Vertex Coefficients for PS-b-PBD and PS-b-PVME at selected compositions

**Table S1.** Characteristic squared wavenumber  $\chi^*$  at spinodals for PS-b-PBD and PS-b-PVME melts listed at selected compositions  $\phi_A$  s.

| $\phi_A$ <sup>a</sup> | $\chi^*$ at spinodals |           |
|-----------------------|-----------------------|-----------|
|                       | PS-b-PBD              | PS-b-PVME |
| 0.1                   | 5.5515                | 5.5485    |
| 0.2                   | 4.4715                | 4.4685    |
| 0.3                   | 4.0395                | 4.0380    |
| 0.4                   | 3.8430                | 3.8430    |
| 0.5                   | 3.7845                | 3.7845    |
| 0.6                   | 3.8430                | 3.8430    |
| 0.7                   | 4.0395                | 4.0410    |
| 0.8                   | 4.4715                | 4.4730    |
| 0.9                   | 5.5515                | 5.5545    |

<sup>a</sup> A implies PS block.

**Table S2.** Quadratic vertex coefficients  $\Gamma_{ij}$  s for A-b-B with  $\bar{\epsilon}_{AA} = \bar{\epsilon}_{BB}$  at the indicated compositions  $\phi_A$  s.

| $\phi_A$ | A-b-B <sup>a</sup> |               |               |
|----------|--------------------|---------------|---------------|
|          | $\Gamma_{AA}$      | $\Gamma_{AB}$ | $\Gamma_{BB}$ |
| 0.1      | 315.959            | 315.820       | 315.680       |
| 0.2      | 96.502             | 96.425        | 96.348        |
| 0.3      | 52.997             | 52.955        | 52.913        |
| 0.4      | 38.946             | 38.927        | 38.908        |
| 0.5      | 35.358             | 35.358        | 35.358        |
| 0.6      | 38.908             | 38.927        | 38.946        |
| 0.7      | 52.913             | 52.955        | 52.997        |
| 0.8      | 96.348             | 96.425        | 96.502        |
| 0.9      | 315.680            | 315.820       | 315.959       |

**Table S3.** Cubic vertex coefficients  $\eta^2 N_c \Gamma_{ijk}$  s for A-b-B at the indicated compositions  $\phi_A$  s.

| $\phi_A$ | $\eta^2 N_c \Gamma_{ijk}^a$ |                           |                           |                           |
|----------|-----------------------------|---------------------------|---------------------------|---------------------------|
|          | $\eta^2 N_c \Gamma_{AAA}$   | $\eta^2 N_c \Gamma_{AAB}$ | $\eta^2 N_c \Gamma_{ABB}$ | $\eta^2 N_c \Gamma_{BBB}$ |
| 0.1      | -1315.699                   | 1.233                     | 5.216                     | -6.731                    |
| 0.2      | -192.764                    | 1.627                     | 2.688                     | -7.263                    |
| 0.3      | -65.597                     | 1.487                     | 1.916                     | -8.984                    |
| 0.4      | -31.550                     | 1.418                     | 1.586                     | -12.232                   |
| 0.5      | -18.415                     | 1.444                     | 1.444                     | -18.415                   |
| 0.6      | -12.232                     | 1.586                     | 1.418                     | -31.550                   |
| 0.7      | -8.984                      | 1.916                     | 1.487                     | -65.597                   |
| 0.8      | -7.263                      | 2.688                     | 1.627                     | -192.764                  |
| 0.9      | -6.731                      | 5.216                     | 1.233                     | -1315.699                 |

<sup>a</sup> These values are determined at their respective spinodal points.**Table S4.** Quadratic vertex coefficients  $\Gamma_{ij}$  s for PS-b-PBD and PS-b-PVME at the indicated compositions  $\phi_A$  s.

| $\phi_A$ | PS-b-PBD <sup>a</sup> |               |               | PS-b-PVME <sup>a</sup> |               |               |
|----------|-----------------------|---------------|---------------|------------------------|---------------|---------------|
|          | $\Gamma_{AA}$         | $\Gamma_{AB}$ | $\Gamma_{BB}$ | $\Gamma_{AA}$          | $\Gamma_{AB}$ | $\Gamma_{BB}$ |
| 0.1      | 313.410               | 313.445       | 313.479       | 24.449                 | 25.472        | 26.538        |
| 0.2      | 95.666                | 95.721        | 95.776        | 39.788                 | 40.992        | 42.232        |
| 0.3      | 52.520                | 52.586        | 52.652        | 42.515                 | 43.730        | 44.980        |
| 0.4      | 38.590                | 38.668        | 38.747        | 43.009                 | 44.213        | 45.449        |
| 0.5      | 35.044                | 35.138        | 35.232        | 42.672                 | 43.855        | 45.071        |
| 0.6      | 38.628                | 38.744        | 38.860        | 41.734                 | 42.892        | 44.082        |
| 0.7      | 52.652                | 52.802        | 52.952        | 39.898                 | 41.022        | 42.178        |
| 0.8      | 96.157                | 96.364        | 96.572        | 35.569                 | 36.633        | 37.729        |
| 0.9      | 315.907               | 316.219       | 316.532       | 17.474                 | 18.288        | 19.140        |

<sup>a</sup> These values are determined at their respective spinodal points.**Table S5.** Quartic vertex coefficients  $\eta^3 N_c \delta_{ijkl}^{BCC} / c_{BCC}$  s in Equation (12) for BCC-forming PS-b-PBD at the indicated  $\phi_A$  s.

| $\phi_A$ | comment <sup>a b</sup>                           |                                                  |                                                                                                 |                                                  |                                                  |
|----------|--------------------------------------------------|--------------------------------------------------|-------------------------------------------------------------------------------------------------|--------------------------------------------------|--------------------------------------------------|
|          | $\frac{\eta^3 N_c \delta_{AAAA}^{BCC}}{c_{BCC}}$ | $\frac{\eta^3 N_c \delta_{AAAB}^{BCC}}{c_{BCC}}$ | $\frac{\eta^3}{3c_{BCC}} N_c (\delta_{AABB}^{BCC} + \delta_{ABAB}^{BCC} + \delta_{ABBA}^{BCC})$ | $\frac{\eta^3 N_c \delta_{ABBB}^{BCC}}{c_{BCC}}$ | $\frac{\eta^3 N_c \delta_{BBBB}^{BCC}}{c_{BCC}}$ |
| 0.1      | 422669.520                                       | -20.100                                          | -53.241                                                                                         | 137.637                                          | 292.611                                          |
| 0.2      | 31837.194                                        | 22.243                                           | -43.249                                                                                         | 65.823                                           | 344.358                                          |
| 0.3      | 7388.133                                         | 26.265                                           | -35.172                                                                                         | 44.189                                           | 473.868                                          |
| 0.4      | 2722.107                                         | 27.625                                           | -31.273                                                                                         | 34.675                                           | 734.811                                          |
| 0.5      | 1298.298                                         | 29.953                                           | -30.121                                                                                         | 29.953                                           | 1298.298                                         |
| 0.6      | 734.811                                          | 34.675                                           | -31.273                                                                                         | 27.625                                           | 2722.107                                         |
| 0.7      | 473.868                                          | 44.189                                           | -35.172                                                                                         | 26.265                                           | 7388.133                                         |
| 0.8      | 344.358                                          | 65.823                                           | -43.249                                                                                         | 22.243                                           | 31837.194                                        |
| 0.9      | 292.611                                          | 137.637                                          | -53.241                                                                                         | -20.100                                          | 422669.520                                       |

<sup>a</sup> These values are determined at their respective spinodal points. <sup>b</sup>  $c_{BCC} = 36 / 4! (\sqrt{6})^4$ .

**Table S6.** Quartic vertex coefficients  $\eta^3 N_c \delta_{ijkl}^{HEX} / c_{HEX}$  s in Equation (11) for cylinder-forming PS-b-PBD at the indicated  $\phi_A$  s.

| $\phi_A$ | comment <sup>a b</sup>                           |                                                  |                                                                                                 |                                                  |                                                  |
|----------|--------------------------------------------------|--------------------------------------------------|-------------------------------------------------------------------------------------------------|--------------------------------------------------|--------------------------------------------------|
|          | $\frac{\eta^3 N_c \delta_{AAAA}^{HEX}}{c_{HEX}}$ | $\frac{\eta^3 N_c \delta_{AAAB}^{HEX}}{c_{HEX}}$ | $\frac{\eta^3}{3c_{HEX}} N_c (\delta_{AABB}^{HEX} + \delta_{ABAB}^{HEX} + \delta_{ABBA}^{HEX})$ | $\frac{\eta^3 N_c \delta_{ABBB}^{HEX}}{c_{HEX}}$ | $\frac{\eta^3 N_c \delta_{BBBB}^{HEX}}{c_{HEX}}$ |
| 0.1      | 140767.628                                       | -34.880                                          | -25.291                                                                                         | 43.998                                           | 97.187                                           |
| 0.2      | 10588.676                                        | -1.484                                           | -18.365                                                                                         | 20.272                                           | 114.128                                          |
| 0.3      | 2453.829                                         | 4.148                                            | -14.553                                                                                         | 13.060                                           | 156.938                                          |
| 0.4      | 902.995                                          | 6.221                                            | -12.813                                                                                         | 9.717                                            | 243.378                                          |
| 0.5      | 430.267                                          | 7.757                                            | -12.307                                                                                         | 7.757                                            | 430.267                                          |
| 0.6      | 243.378                                          | 9.717                                            | -12.813                                                                                         | 6.221                                            | 902.995                                          |
| 0.7      | 156.938                                          | 13.060                                           | -14.553                                                                                         | 4.148                                            | 2453.829                                         |
| 0.8      | 114.128                                          | 20.272                                           | -18.365                                                                                         | -1.484                                           | 10588.676                                        |
| 0.9      | 97.187                                           | 43.998                                           | -25.291                                                                                         | -34.880                                          | 140767.628                                       |

<sup>a</sup> These values are determined at their respective spinodal points. <sup>b</sup>  $c_{HEX} = 18 / 4! (\sqrt{3})^4$ .

**Table S7.** Quartic vertex coefficients  $\eta^3 N_c \delta_{ijkl}^{LAM} / c_{LAM}$  s in Equation (10) for lamella-forming PS-b-PBD at the indicated  $\phi_A$  s.

| $\phi_A$ | comment <sup>a b</sup>                           |                                                  |                                                                                                 |                                                  |                                                  |
|----------|--------------------------------------------------|--------------------------------------------------|-------------------------------------------------------------------------------------------------|--------------------------------------------------|--------------------------------------------------|
|          | $\frac{\eta^3 N_c \delta_{AAAA}^{LAM}}{c_{LAM}}$ | $\frac{\eta^3 N_c \delta_{AAAB}^{LAM}}{c_{LAM}}$ | $\frac{\eta^3}{3c_{LAM}} N_c (\delta_{AABB}^{LAM} + \delta_{ABAB}^{LAM} + \delta_{ABBA}^{LAM})$ | $\frac{\eta^3 N_c \delta_{ABBB}^{LAM}}{c_{LAM}}$ | $\frac{\eta^3 N_c \delta_{BBBB}^{LAM}}{c_{LAM}}$ |
| 0.1      | 28102.894                                        | -17.928                                          | -7.910                                                                                          | 8.096                                            | 19.307                                           |
| 0.2      | 2108.194                                         | -3.656                                           | -5.124                                                                                          | 3.446                                            | 22.585                                           |
| 0.3      | 487.280                                          | -0.878                                           | -3.935                                                                                          | 2.008                                            | 31.015                                           |
| 0.4      | 178.920                                          | 0.150                                            | -3.421                                                                                          | 1.278                                            | 48.098                                           |
| 0.5      | 85.113                                           | 0.743                                            | -3.274                                                                                          | 0.743                                            | 85.113                                           |
| 0.6      | 48.098                                           | 1.278                                            | -3.421                                                                                          | 0.150                                            | 178.920                                          |
| 0.7      | 31.015                                           | 2.008                                            | -3.935                                                                                          | -0.878                                           | 487.280                                          |
| 0.8      | 22.585                                           | 3.446                                            | -5.124                                                                                          | -3.656                                           | 2108.194                                         |
| 0.9      | 19.307                                           | 8.096                                            | -7.910                                                                                          | -17.928                                          | 28102.894                                        |

<sup>a</sup> These values are determined at their respective spinodal points. <sup>b</sup>  $c_{LAM} = 1 / 4$ .
